# Supplementary material for: Indirect impacts of the COVID-19 pandemic at two tertiary neonatal units in Zimbabwe and Malawi: an interrupted time series analysis
Source: HighWire-hosted journal article supplement (doi:10.1136/bmjopen-2021-048955), 2022-06-01
Supplement: bmjopen-2021-048955supp001_data_supplement.pdf [file bmjopen-2021-048955supp001_data_supplement.pdf]

## SUPPLEMENTARY FIGURES

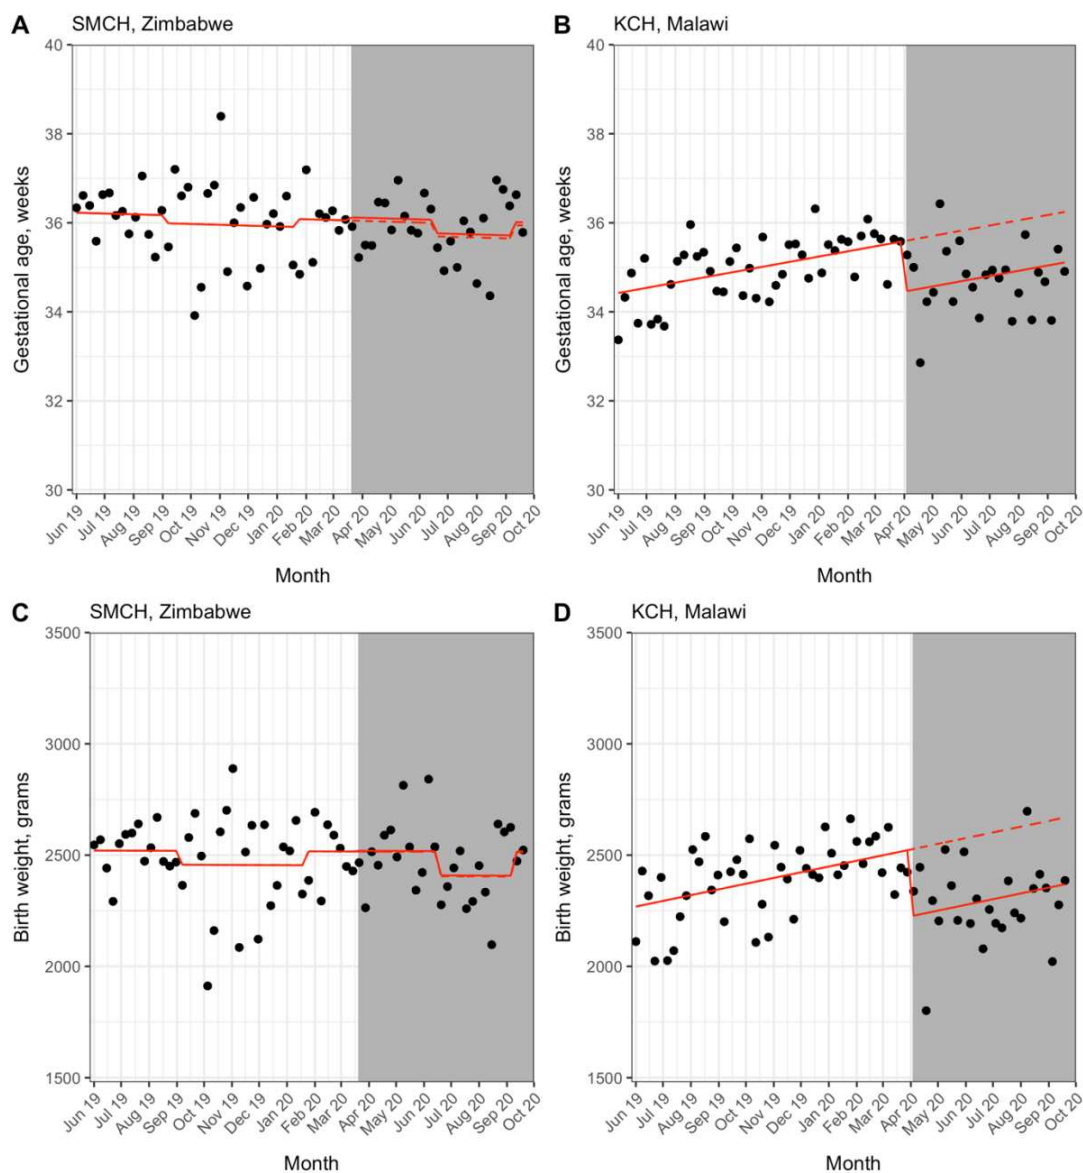

**Supplementary Figure 1:** Interrupted time series for gestational age and birth weight

- Data points represent weekly mean gestational age or birth weight to avoid overplotting.
- White background: pre-COVID-19 period; grey background: post-COVID-19 period.
- Solid line: predicted trend from linear regression model; dashed line: counterfactual scenario.
- SMCH models (panels A & C) adjusted for doctors' and nurses' strike periods, KCH models (panels B & D) unadjusted.
- Data from all admission forms completed, irrespective of match status.
- *SMCH: Sally Mugabe Central Hospital; KCH: Kamuzu Central Hospital*

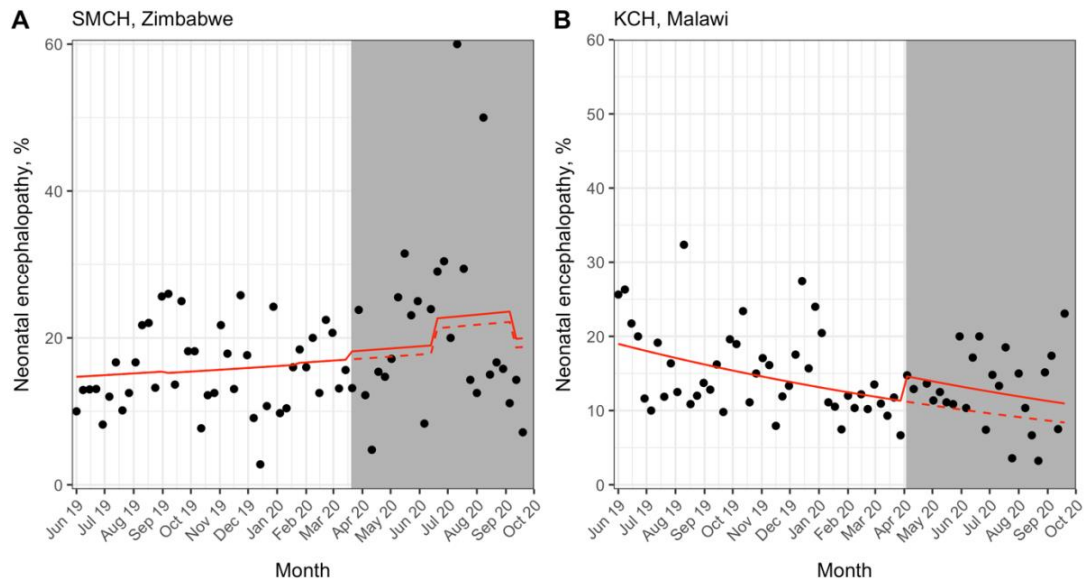

**Supplementary Figure 2:** Interrupted time series for prevalence of neonatal encephalopathy

- White background: pre-COVID-19 period; grey background: post-COVID-19 period.
- Solid line: predicted trend from Poisson regression model; dashed line: counterfactual scenario.
- SMCH model (panel A) adjusted for doctors' and nurses' strike periods, KCH model (panel B) unadjusted.
- Data from matched admission and outcome forms only.
- *SMCH: Sally Mugabe Central Hospital; KCH: Kamuzu Central Hospital*

## APPENDIX 1: STROBE CHECKLIST

|                              | Item No. | Recommendation                                                                                                                                                                                                                                                                                                                                                                                                                                                         | Page No. |
|------------------------------|----------|------------------------------------------------------------------------------------------------------------------------------------------------------------------------------------------------------------------------------------------------------------------------------------------------------------------------------------------------------------------------------------------------------------------------------------------------------------------------|----------|
| <b>Title and abstract</b>    | 1        | (a) Indicate the study's design with a commonly used term in the title or the abstract                                                                                                                                                                                                                                                                                                                                                                                 | 1-2      |
|                              |          | (b) Provide in the abstract an informative and balanced summary of what was done and what was found                                                                                                                                                                                                                                                                                                                                                                    | 2        |
| <b>Introduction</b>          |          |                                                                                                                                                                                                                                                                                                                                                                                                                                                                        |          |
| Background/rationale         | 2        | Explain the scientific background and rationale for the investigation being reported                                                                                                                                                                                                                                                                                                                                                                                   | 4-5      |
| Objectives                   | 3        | State specific objectives, including any prespecified hypotheses                                                                                                                                                                                                                                                                                                                                                                                                       | 5        |
| <b>Methods</b>               |          |                                                                                                                                                                                                                                                                                                                                                                                                                                                                        |          |
| Study design                 | 4        | Present key elements of study design early in the paper                                                                                                                                                                                                                                                                                                                                                                                                                | 9-10     |
| Setting                      | 5        | Describe the setting, locations, and relevant dates, including periods of recruitment, exposure, follow-up, and data collection                                                                                                                                                                                                                                                                                                                                        | 6-8      |
| Participants                 | 6        | (a) <i>Cohort study</i> —Give the eligibility criteria, and the sources and methods of selection of participants. Describe methods of follow-up<br><i>Case-control study</i> —Give the eligibility criteria, and the sources and methods of case ascertainment and control selection. Give the rationale for the choice of cases and controls<br><i>Cross-sectional study</i> —Give the eligibility criteria, and the sources and methods of selection of participants | 7        |
|                              |          | (b) <i>Cohort study</i> —For matched studies, give matching criteria and number of exposed and unexposed<br><i>Case-control study</i> —For matched studies, give matching criteria and the number of controls per case                                                                                                                                                                                                                                                 | n/a      |
| Variables                    | 7        | Clearly define all outcomes, exposures, predictors, potential confounders, and effect modifiers. Give diagnostic criteria, if applicable                                                                                                                                                                                                                                                                                                                               | 8        |
| Data sources/<br>measurement | 8*       | For each variable of interest, give sources of data and details of methods of assessment (measurement). Describe comparability of assessment methods if there is more than one group                                                                                                                                                                                                                                                                                   | 7-8      |
| Bias                         | 9        | Describe any efforts to address potential sources of bias                                                                                                                                                                                                                                                                                                                                                                                                              | 9-10     |
| Study size                   | 10       | Explain how the study size was arrived at                                                                                                                                                                                                                                                                                                                                                                                                                              | 7        |
| Quantitative variables       | 11       | Explain how quantitative variables were handled in the analyses. If applicable, describe which groupings were chosen and why                                                                                                                                                                                                                                                                                                                                           | 9-10     |

|                     |     |                                                                                                                                                                                                                                                                                                           |                      |
|---------------------|-----|-----------------------------------------------------------------------------------------------------------------------------------------------------------------------------------------------------------------------------------------------------------------------------------------------------------|----------------------|
| Statistical methods | 12  | (a) Describe all statistical methods, including those used to control for confounding                                                                                                                                                                                                                     | 9-10                 |
|                     |     | (b) Describe any methods used to examine subgroups and interactions                                                                                                                                                                                                                                       | 9-10,<br>Appendix 5  |
|                     |     | (c) Explain how missing data were addressed                                                                                                                                                                                                                                                               | 9-10,<br>Appendix 4  |
|                     |     | (d) <i>Cohort study</i> —If applicable, explain how loss to follow-up was addressed<br><i>Case-control study</i> —If applicable, explain how matching of cases and controls was addressed<br><i>Cross-sectional study</i> —If applicable, describe analytical methods taking account of sampling strategy | 9                    |
|                     |     | (e) Describe any sensitivity analyses                                                                                                                                                                                                                                                                     | 9-10,<br>Appendix 5  |
| <b>Results</b>      |     |                                                                                                                                                                                                                                                                                                           |                      |
| Participants        | 13* | (a) Report numbers of individuals at each stage of study—eg numbers potentially eligible, examined for eligibility, confirmed eligible, included in the study, completing follow-up, and analysed                                                                                                         | 12, Appendix 3       |
|                     |     | (b) Give reasons for non-participation at each stage                                                                                                                                                                                                                                                      | 9, Appendix 3        |
|                     |     | (c) Consider use of a flow diagram                                                                                                                                                                                                                                                                        | Appendix 3           |
| Descriptive data    | 14* | (a) Give characteristics of study participants (eg demographic, clinical, social) and information on exposures and potential confounders                                                                                                                                                                  | 12-13,<br>Appendix 5 |
|                     |     | (b) Indicate number of participants with missing data for each variable of interest                                                                                                                                                                                                                       | Appendix 4           |
|                     |     | (c) <i>Cohort study</i> —Summarise follow-up time (eg, average and total amount)                                                                                                                                                                                                                          | 7                    |
| Outcome data        | 15* | <i>Cohort study</i> —Report numbers of outcome events or summary measures over time                                                                                                                                                                                                                       | 12-15                |
|                     |     | <i>Case-control study</i> —Report numbers in each exposure category, or summary measures of exposure                                                                                                                                                                                                      | n/a                  |
|                     |     | <i>Cross-sectional study</i> —Report numbers of outcome events or summary measures                                                                                                                                                                                                                        | n/a                  |
| Main results        | 16  | (a) Give unadjusted estimates and, if applicable, confounder-adjusted estimates and their precision (eg, 95% confidence interval). Make clear which confounders were adjusted for and why they were included                                                                                              | 12-15                |
|                     |     | (b) Report category boundaries when continuous variables were categorized                                                                                                                                                                                                                                 | 12-15                |
|                     |     | (c) If relevant, consider translating estimates of relative risk into absolute risk for a meaningful time period                                                                                                                                                                                          | 12-15                |

|                          |    |                                                                                                                                                                            |                        |
|--------------------------|----|----------------------------------------------------------------------------------------------------------------------------------------------------------------------------|------------------------|
| Other analyses           | 17 | Report other analyses done—eg analyses of subgroups and interactions, and sensitivity analyses                                                                             | Appendix 5, Appendix 6 |
| <b>Discussion</b>        |    |                                                                                                                                                                            |                        |
| Key results              | 18 | Summarise key results with reference to study objectives                                                                                                                   | 16                     |
| Limitations              | 19 | Discuss limitations of the study, taking into account sources of potential bias or imprecision. Discuss both direction and magnitude of any potential bias                 | 18-19                  |
| Interpretation           | 20 | Give a cautious overall interpretation of results considering objectives, limitations, multiplicity of analyses, results from similar studies, and other relevant evidence | 16-19                  |
| Generalisability         | 21 | Discuss the generalisability (external validity) of the study results                                                                                                      | 16-19                  |
| <b>Other information</b> |    |                                                                                                                                                                            |                        |
| Funding                  | 22 | Give the source of funding and the role of the funders for the present study and, if applicable, for the original study on which the present article is based              | 26                     |

Adapted from: von Elm E, Altman DG, Egger M, Pocock SJ, Gøtzsche PC, et al. (2007) The Strengthening the Reporting of Observational Studies in Epidemiology (STROBE) Statement: Guidelines for Reporting Observational Studies. *PLOS Medicine* 4(10): e296. <https://doi.org/10.1371/journal.pmed.0040296>

## APPENDIX 2: ETHICAL APPROVAL

Ethical approval for this study was granted by the following ethics committees.

**Table A2.1:** Ethical approval

| Committee                                                                                                                      | Reference    |
|--------------------------------------------------------------------------------------------------------------------------------|--------------|
| <i>United Kingdom</i>                                                                                                          |              |
| University College London Research Ethics Committee                                                                            | 17123/001    |
| <i>Malawi</i>                                                                                                                  |              |
| College of Medicine Research and Ethics Committee                                                                              | P.01/20/2909 |
| <i>Zimbabwe</i>                                                                                                                |              |
| Medical Research Council of Zimbabwe                                                                                           | MRCZ/A/2570  |
| Joint Research Ethics Committee for the University of Zimbabwe, College of Health Sciences and Parirenyatwa Group of Hospitals | JREC/327/19  |
| Biomedical Research and Training Institute Institutional Review Board                                                          | AP155/2020   |
| Sally Mugabe (Harare) Central Hospital Ethics Committee                                                                        | 071119/64    |

### APPENDIX 3: FLOW DIAGRAMS OF RECORD INCLUSION

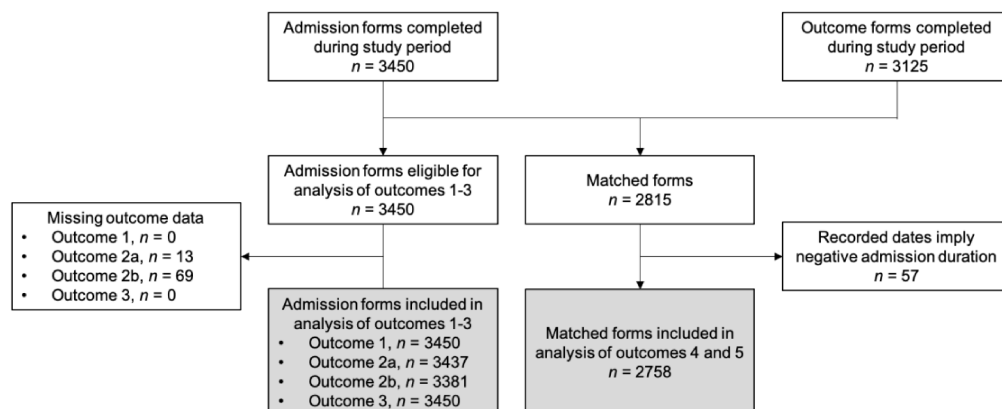

**Figure A3.1:** Flow diagram of record inclusion for Sally Mugabe Central Hospital, Zimbabwe

- Outcome 1: number of admissions; outcome 2a: gestational age; outcome 2b: birth weight; outcome 3: source of admission; outcome 4: prevalence of neonatal encephalopathy; outcome 5: overall mortality rate

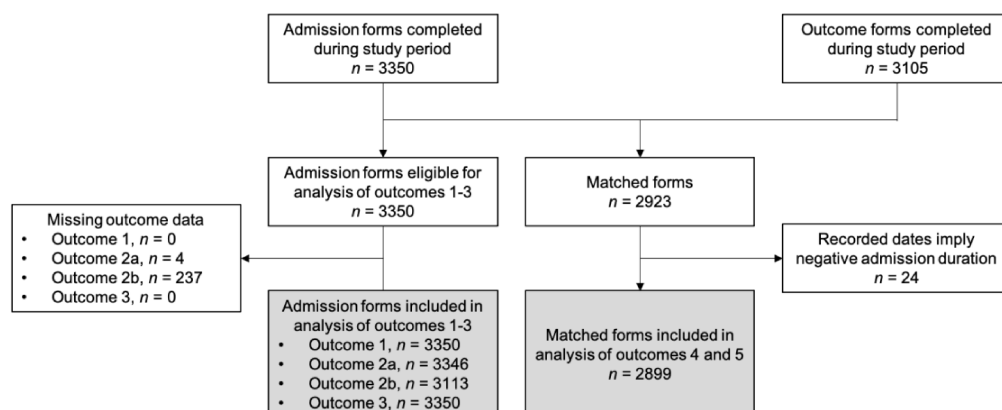

**Figure A3.2:** Flow diagram of record inclusion for Kamuzu Central Hospital, Malawi

- Outcome 1: number of admissions; outcome 2a: gestational age; outcome 2b: birth weight; outcome 3: source of admission; outcome 4: prevalence of neonatal encephalopathy; outcome 5: overall mortality rate

## APPENDIX 4: MISSING DATA

The table below shows the number of participants with missing data for each outcome and the number of participants remaining for each analysis after pairwise deletion of missing values.

**Table A4.1:** Summary of missing data

| Characteristics         | <i>n</i> missing (%) |           | <i>n</i> remaining* |               |
|-------------------------|----------------------|-----------|---------------------|---------------|
|                         | SMCH                 | KCH       | SMCH                | KCH           |
| Gestational age         | 13 (0.4)             | 4 (0.1)   | 3437 (99.6)         | 3346 (99.9)   |
| Birth weight            | 69 (2.0)             | 237 (7.1) | 3381 (98.0)         | 3113 (92.9)   |
| Source of admission     | 0 (0.0)              | 0 (0.0)   | 3450 (100.0)        | 3350 (100.0)  |
| Neonatal encephalopathy | 0 (0.0)              | 0 (0.0)   | 2758 (100.0)†       | 2899 (100.0)† |
| Death                   | 0 (0.0)              | 0 (0.0)   | 2758 (100.0)†       | 2899 (100.0)† |

- \* Remaining for analysis after pairwise deletion.
- † Only matched admission and outcome forms considered for analysis of neonatal encephalopathy and death.
- SMCH: Sally Mugabe Central Hospital; KCH: Kamuzu Central Hospital, Malawi



## APPENDIX 5: FURTHER REGRESSION ANALYSIS RESULTS

## Outcome 1: Admissions to the neonatal unit

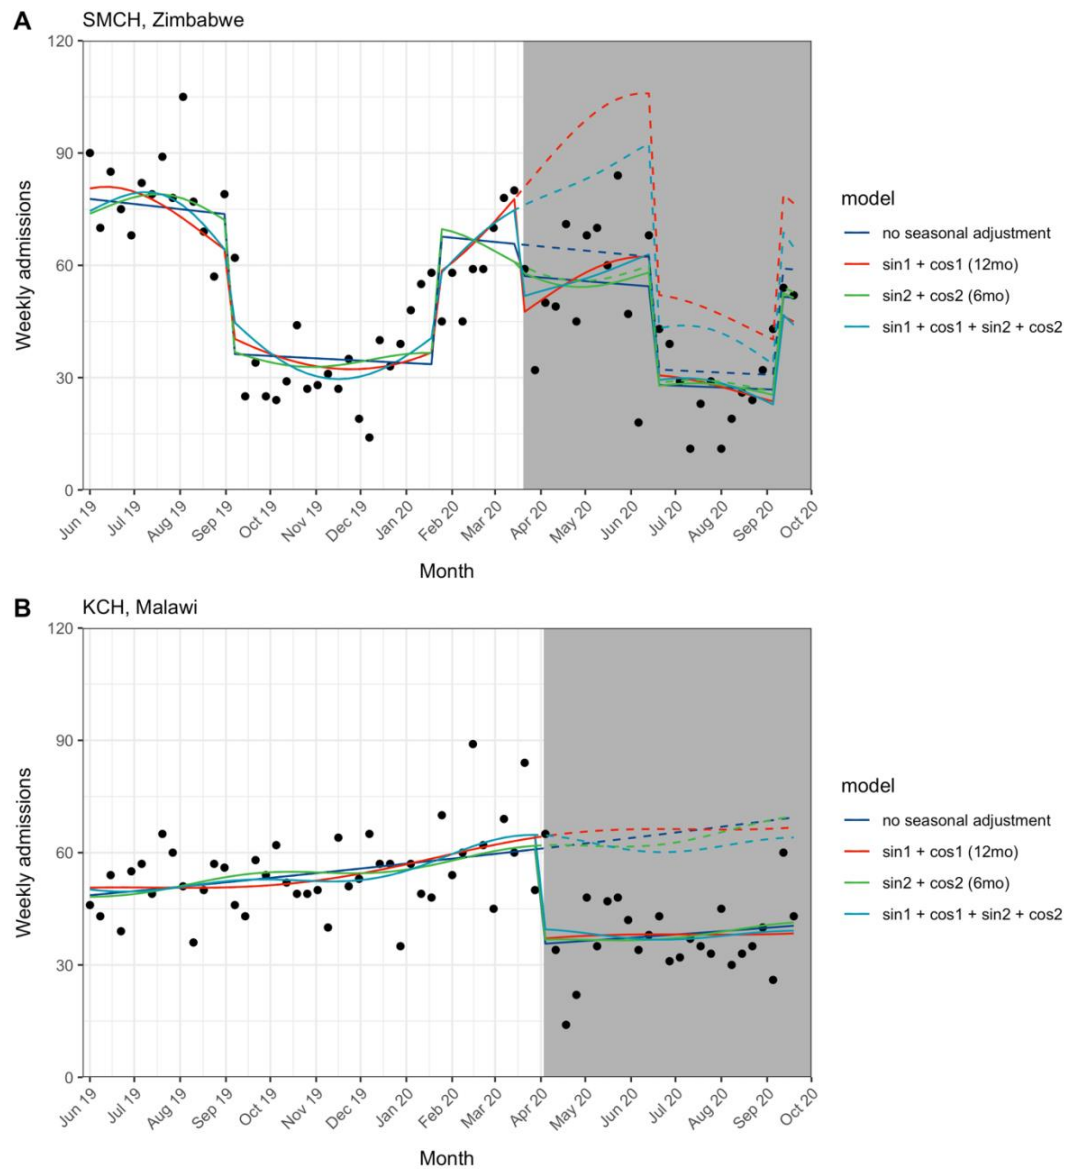

**Figure A5.1.1:** Interrupted time series for weekly admissions to the neonatal unit, negative binomial regression models with and without seasonal adjustment

**Table A5.1.1:** SMCH, Zimbabwe; Results of the models with and without adjustment for seasonality

| Model*                                                                                 | BIC   | LR statistic† | Df | p-value |
|----------------------------------------------------------------------------------------|-------|---------------|----|---------|
| 0 Negative binomial, unadjusted for seasonality                                        | 585.6 | ref           |    |         |
| 1 Negative binomial, cosine function with 6-month period                               | 588.9 | 5.23          | 2  | 0.07    |
| 2 Negative binomial, cosine function with 12-month period                              | 592.9 | 1.22          | 2  | 0.54    |
| 3 Negative binomial, mixture of two cosine functions with 6-month and 12-month periods | 595.6 | 6.96          | 4  | 0.13    |

- \* All models adjusted for the doctors' and nurses' strike periods.
- † Likelihood ratio  $\chi^2$ -test compared to Model 0.

**Table A5.1.2:** SMCH, Zimbabwe; Negative binomial model, unadjusted for seasonality (Model 0)

|                             | Coef  | SE   | Exp  | 95% CI      | p-value |
|-----------------------------|-------|------|------|-------------|---------|
| <i>Intercept</i>            | 4.35  | 0.09 |      |             |         |
| Post-COVID-19 period, yes   | -0.14 | 0.15 | 0.87 | 0.65 – 1.17 | 0.37    |
| Study time elapsed, weeks   | -0.00 | 0.00 | 1.00 | 0.99 – 1.00 | 0.25    |
| Doctors' strike period, yes | -0.70 | 0.10 | 0.49 | 0.41 – 0.60 | < 0.001 |
| Nurses' strike period, yes  | -0.66 | 0.13 | 0.52 | 0.41 – 0.66 | < 0.001 |

**Table A5.1.3:** KCH, Malawi; Results of the models with and without adjustment for seasonality

| Model                                                                                  | BIC   | LR statistic† | Df | p-value |
|----------------------------------------------------------------------------------------|-------|---------------|----|---------|
| 0 Negative binomial, unadjusted for seasonality                                        | 534.5 | ref           |    |         |
| 1 Negative binomial, cosine function with 6-month period                               | 541.5 | 1.40          | 2  | 0.50    |
| 2 Negative binomial, cosine function with 12-month period                              | 542.4 | 0.52          | 2  | 0.77    |
| 3 Negative binomial, mixture of two cosine functions with 6-month and 12-month periods | 549.1 | 2.36          | 4  | 0.67    |

- † Likelihood ratio  $\chi^2$ -test compared to Model 0.

**Table A5.1.4:** KCH, Malawi; Negative binomial model, unadjusted for seasonality (Model 0)

|                           | Coef  | SE   | Exp  | 95% CI      | p-value |
|---------------------------|-------|------|------|-------------|---------|
| <i>Intercept</i>          | 3.88  | 0.06 |      |             |         |
| Post-COVID-19 period, yes | -0.54 | 0.10 | 0.58 | 0.48 – 0.70 | < 0.001 |
| Study time elapsed, weeks | 0.01  | 0.00 | 1.01 | 1.00 – 1.01 | 0.022   |

## Outcome 2: Gestational age at birth and birth weight

### a. Gestational age at birth

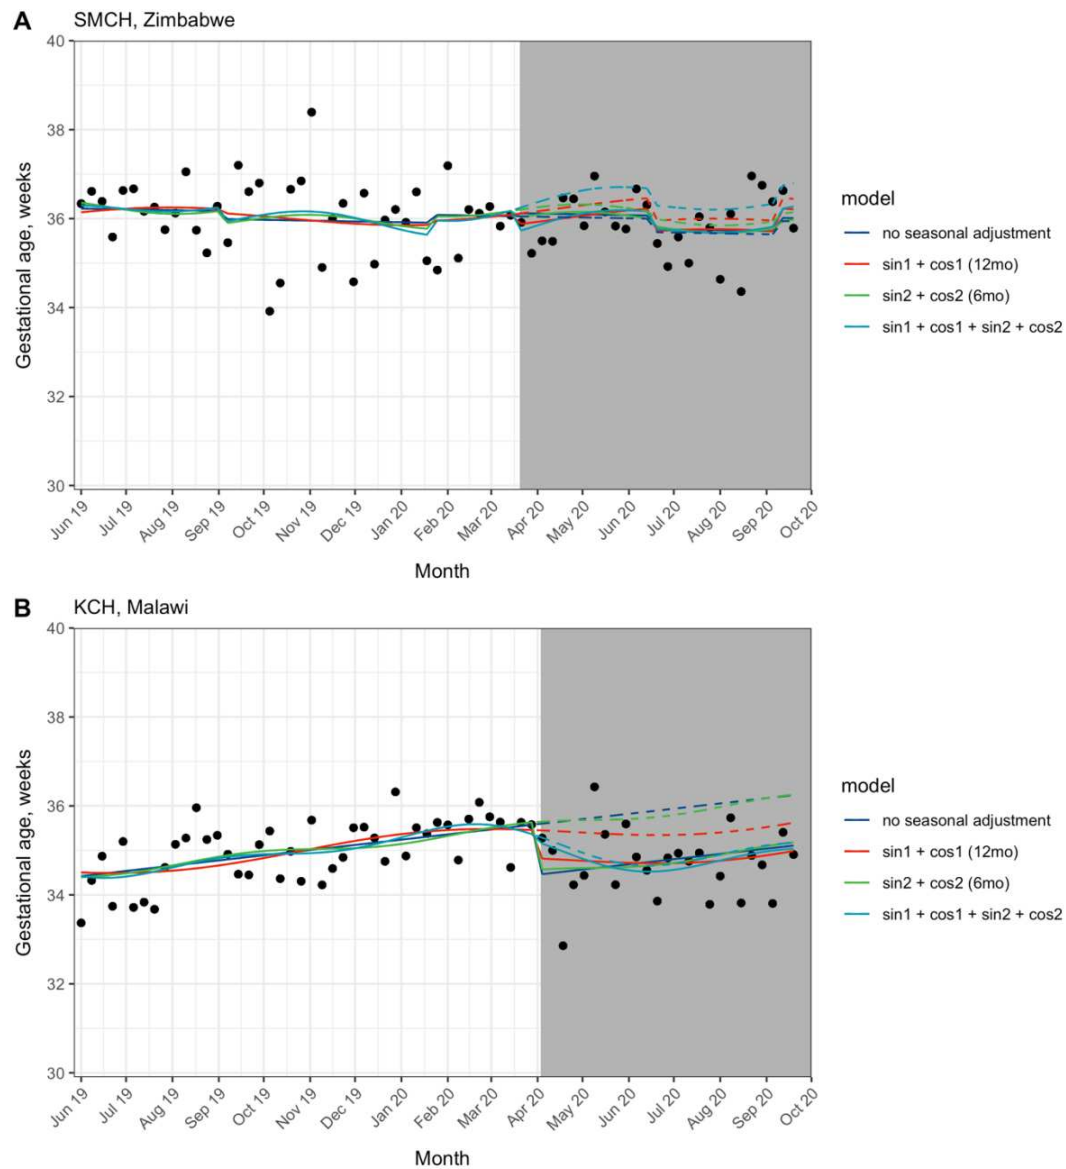

**Figure A5.2.1:** Interrupted time series for gestational age at birth, linear regression models with and without seasonal adjustment

**Table A5.2.1:** SMCH, Zimbabwe; Results of the models with and without adjustment for seasonality

| Model*                                                                      | BIC     | Deviance† | Df | p-value |
|-----------------------------------------------------------------------------|---------|-----------|----|---------|
| 0 Linear, unadjusted for seasonality                                        | 19851.6 | ref       |    |         |
| 1 Linear, cosine function with 6-month period                               | 19866.6 | 24.0      | 2  | 0.53    |
| 2 Linear, cosine function with 12-month period                              | 19867.0 | 15.8      | 2  | 0.65    |
| 3 Linear, mixture of two cosine functions with 6-month and 12-month periods | 19881.4 | 50.9      | 4  | 0.60    |

- \* All models adjusted for the doctors' and nurses' strike periods.
- †  $\chi^2$ -test compared to Model 0.

**Table A5.2.2:** SMCH, Zimbabwe; Linear model, unadjusted for seasonality (Model 0)

|                             | Coef  | SE   | 95% CI       | p-value |
|-----------------------------|-------|------|--------------|---------|
| <i>Intercept</i>            | 36.23 | 0.15 |              |         |
| Post-COVID-19 period, yes   | 0.07  | 0.29 | -0.50 – 0.64 | 0.81    |
| Study time elapsed, weeks   | -0.00 | 0.01 | -0.02 – 0.01 | 0.52    |
| Doctors' strike period, yes | -0.18 | 0.20 | -0.58 – 0.22 | 0.38    |
| Nurses' strike period, yes  | -0.30 | 0.29 | -0.87 – 0.27 | 0.30    |

**Table A5.2.3:** KCH, Malawi; Results of the models with and without adjustment for seasonality

| Model                                                                       | BIC     | Deviance† | Df | p-value |
|-----------------------------------------------------------------------------|---------|-----------|----|---------|
| 0 Linear, unadjusted for seasonality                                        | 18631.8 | ref       |    |         |
| 1 Linear, cosine function with 6-month period                               | 18645.2 | 43.2      | 2  | 0.24    |
| 2 Linear, cosine function with 12-month period                              | 18647.2 | 12.9      | 2  | 0.65    |
| 3 Linear, mixture of two cosine functions with 6-month and 12-month periods | 18658.4 | 89.0      | 4  | 0.21    |

- †  $\chi^2$ -test compared to Model 0.

**Table A5.2.4:** KCH, Malawi; Linear model, unadjusted for seasonality (Model 0)

|                           | Coef  | SE   | 95% CI        | p-value |
|---------------------------|-------|------|---------------|---------|
| <i>Intercept</i>          | 34.42 | 0.15 |               |         |
| Post-COVID-19 period, yes | -1.14 | 0.25 | -1.62 – -0.65 | < 0.001 |
| Study time elapsed, weeks | 0.03  | 0.01 | 0.02 – 0.04   | < 0.001 |

## b. Birth weight

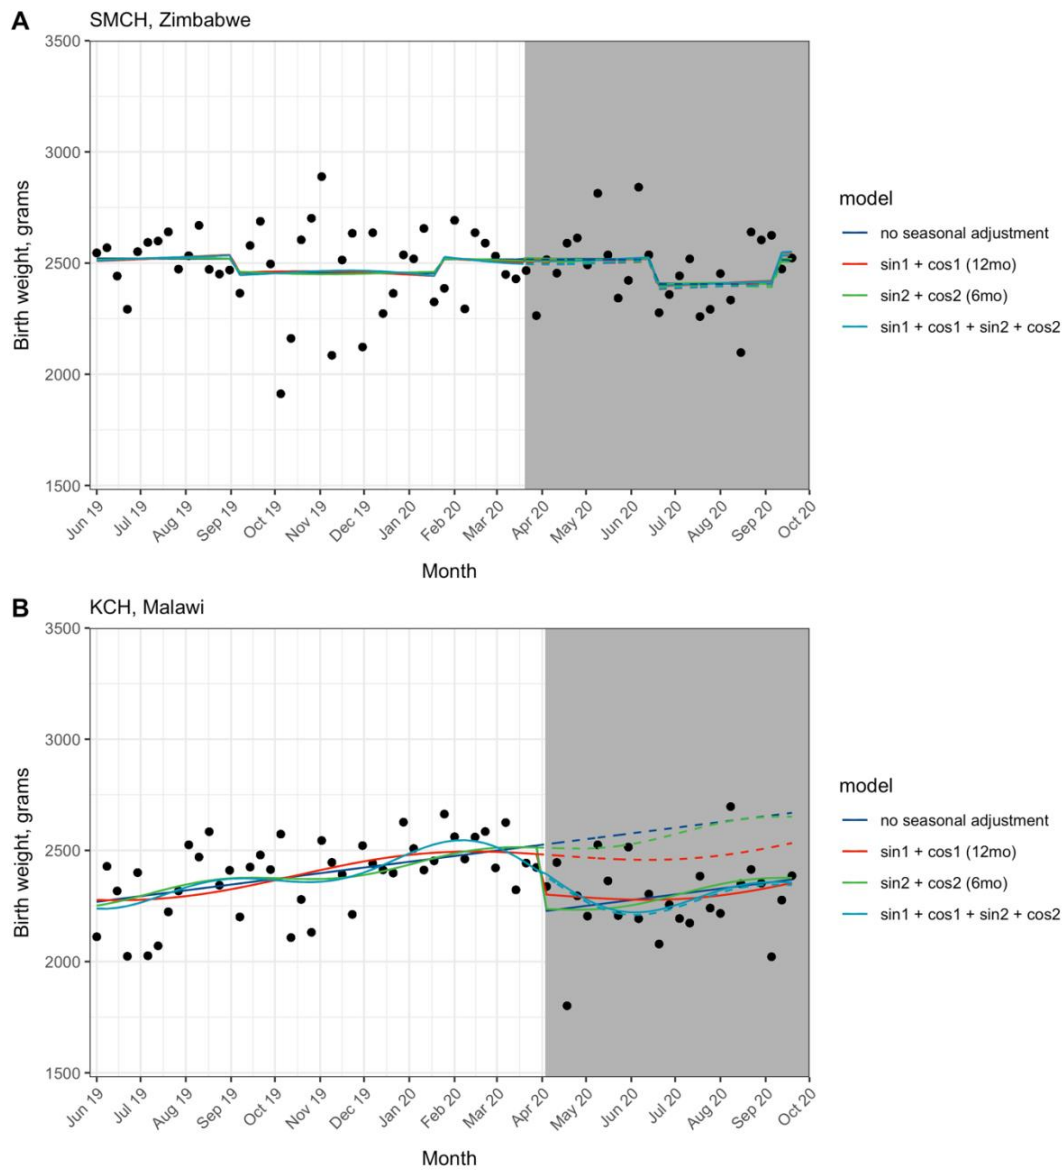

**Figure A5.2.2:** Interrupted time series for birth weight, linear regression models with and without seasonal adjustment

**Table A5.2.5:** SMCH, Zimbabwe; Results of the models with and without adjustment for seasonality

| Model*                                                                      | BIC     | Deviance† | Df | p-value |
|-----------------------------------------------------------------------------|---------|-----------|----|---------|
| 0 Linear, unadjusted for seasonality                                        | 55660.9 | ref       |    |         |
| 1 Linear, cosine function with 6-month period                               | 55676.8 | 289194    | 2  | 0.84    |
| 2 Linear, cosine function with 12-month period                              | 55677.1 | 28641     | 2  | 0.98    |
| 3 Linear, mixture of two cosine functions with 6-month and 12-month periods | 55693.0 | 351647    | 4  | 0.98    |

- \* All models adjusted for the doctors' and nurses' strike periods.
- †  $\chi^2$ -test compared to Model 0.

**Table A5.2.6:** SMCH, Zimbabwe; Linear model, unadjusted for seasonality (Model 0)

|                             | Coef           | SE           | 95% CI         | p-value |
|-----------------------------|----------------|--------------|----------------|---------|
| <i>Intercept</i>            | <i>2520.71</i> | <i>31.89</i> |                |         |
| Post-COVID-19 period, yes   | 3.38           | 61.42        | -117.0 – 123.8 | 0.96    |
| Study time elapsed, weeks   | -0.11          | 1.38         | -2.8 – 2.6     | 0.94    |
| Doctors' strike period, yes | -62.52         | 42.92        | -146.6 – 21.6  | 0.15    |
| Nurses' strike period, yes  | -109.4         | 61.0         | -229.0 – 10.2  | 0.07    |

**Table A5.2.7:** KCH, Malawi; Results of the models with and without adjustment for seasonality

| Model                                                                       | BIC     | Deviance† | Df | p-value |
|-----------------------------------------------------------------------------|---------|-----------|----|---------|
| 0 Linear, unadjusted for seasonality                                        | 51050.5 | ref       |    |         |
| 1 Linear, cosine function with 6-month period                               | 51064.1 | 1922568   | 2  | 0.29    |
| 2 Linear, cosine function with 12-month period                              | 51065.2 | 1105739   | 2  | 0.49    |
| 3 Linear, mixture of two cosine functions with 6-month and 12-month periods | 51073.9 | 6744491   | 4  | 0.07    |

- †  $\chi^2$ -test compared to Model 0.

**Table A5.2.8:** KCH, Malawi; Linear model, unadjusted for seasonality (Model 0)

|                           | Coef           | SE           | 95% CI          | p-value |
|---------------------------|----------------|--------------|-----------------|---------|
| <i>Intercept</i>          | <i>2268.96</i> | <i>36.02</i> |                 |         |
| Post-COVID-19 period, yes | -299.89        | 57.34        | -412.3 – -187.5 | < 0.001 |
| Study time elapsed, weeks | 5.88           | 1.37         | 3.2 – 8.6       | < 0.001 |

**Outcome 3: Source of admission referral**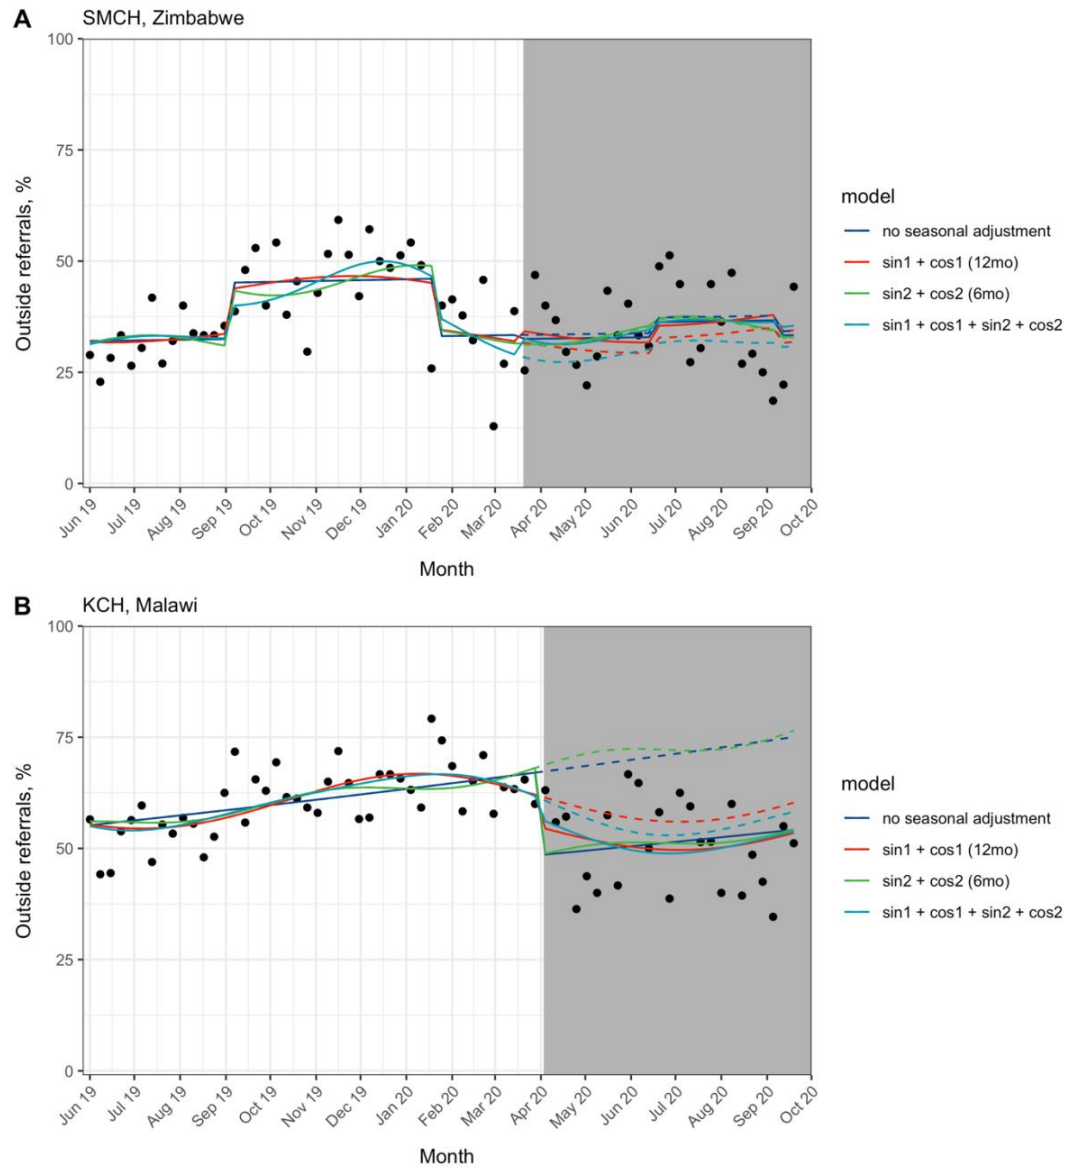

**Figure A5.3.1:** Interrupted time series for outside referrals to the neonatal unit, Poisson regression models with and without seasonal adjustment

**Table A5.3.1:** SMCH, Zimbabwe; Results of the models with and without adjustment for seasonality

| Model*                                                                       | BIC   | Deviance† | Df | p-value |
|------------------------------------------------------------------------------|-------|-----------|----|---------|
| 0 Poisson, unadjusted for seasonality                                        | 406.3 | ref       |    |         |
| 1 Poisson, cosine function with 6-month period                               | 414.2 | 0.56      | 2  | 0.76    |
| 2 Poisson, cosine function with 12-month period                              | 412.9 | 1.85      | 2  | 0.40    |
| 3 Poisson, mixture of two cosine functions with 6-month and 12-month periods | 419.8 | 3.42      | 4  | 0.49    |

- \* All models adjusted for the doctors' and nurses' strike periods.
- †  $\chi^2$ -test compared to Model 0.

**Table A5.3.2:** SMCH, Zimbabwe; Poisson model, unadjusted for seasonality (Model 0)

|                             | Coef  | SE   | Exp  | 95% CI      | p-value |
|-----------------------------|-------|------|------|-------------|---------|
| <i>Intercept</i>            | -1.14 | 0.06 |      |             |         |
| Post-COVID-19 period, yes   | -0.03 | 0.12 | 0.97 | 0.77 – 1.22 | 0.81    |
| Study time elapsed, weeks   | 0.00  | 0.00 | 1.00 | 1.00 – 1.01 | 0.70    |
| Doctors' strike period, yes | 0.33  | 0.07 | 1.39 | 1.20 – 1.61 | < 0.001 |
| Nurses' strike period, yes  | 0.10  | 0.11 | 1.10 | 0.88 – 1.37 | 0.39    |

**Table A5.3.3:** KCH, Malawi; Results of the models with and without adjustment for seasonality

| Model                                                                        | BIC   | Deviance† | Df | p-value |
|------------------------------------------------------------------------------|-------|-----------|----|---------|
| 0 Poisson, unadjusted for seasonality                                        | 398.0 | ref       |    |         |
| 1 Poisson, cosine function with 6-month period                               | 403.3 | 3.23      | 2  | 0.20    |
| 2 Poisson, cosine function with 12-month period                              | 405.9 | 0.58      | 2  | 0.75    |
| 3 Poisson, mixture of two cosine functions with 6-month and 12-month periods | 411.5 | 3.43      | 4  | 0.49    |

- †  $\chi^2$ -test compared to Model 0.

**Table A5.3.4:** KCH, Malawi; Poisson model, unadjusted for seasonality (Model 0)

|                           | Coef  | SE   | Exp  | 95% CI      | p-value |
|---------------------------|-------|------|------|-------------|---------|
| <i>Intercept</i>          | -0.59 | 0.05 |      |             |         |
| Post-COVID-19 period, yes | -0.33 | 0.08 | 0.72 | 0.61 – 0.85 | < 0.001 |
| Study time elapsed, weeks | 0.01  | 0.00 | 1.01 | 1.00 – 1.01 | 0.020   |



### Outcome 4: Prevalence of neonatal encephalopathy

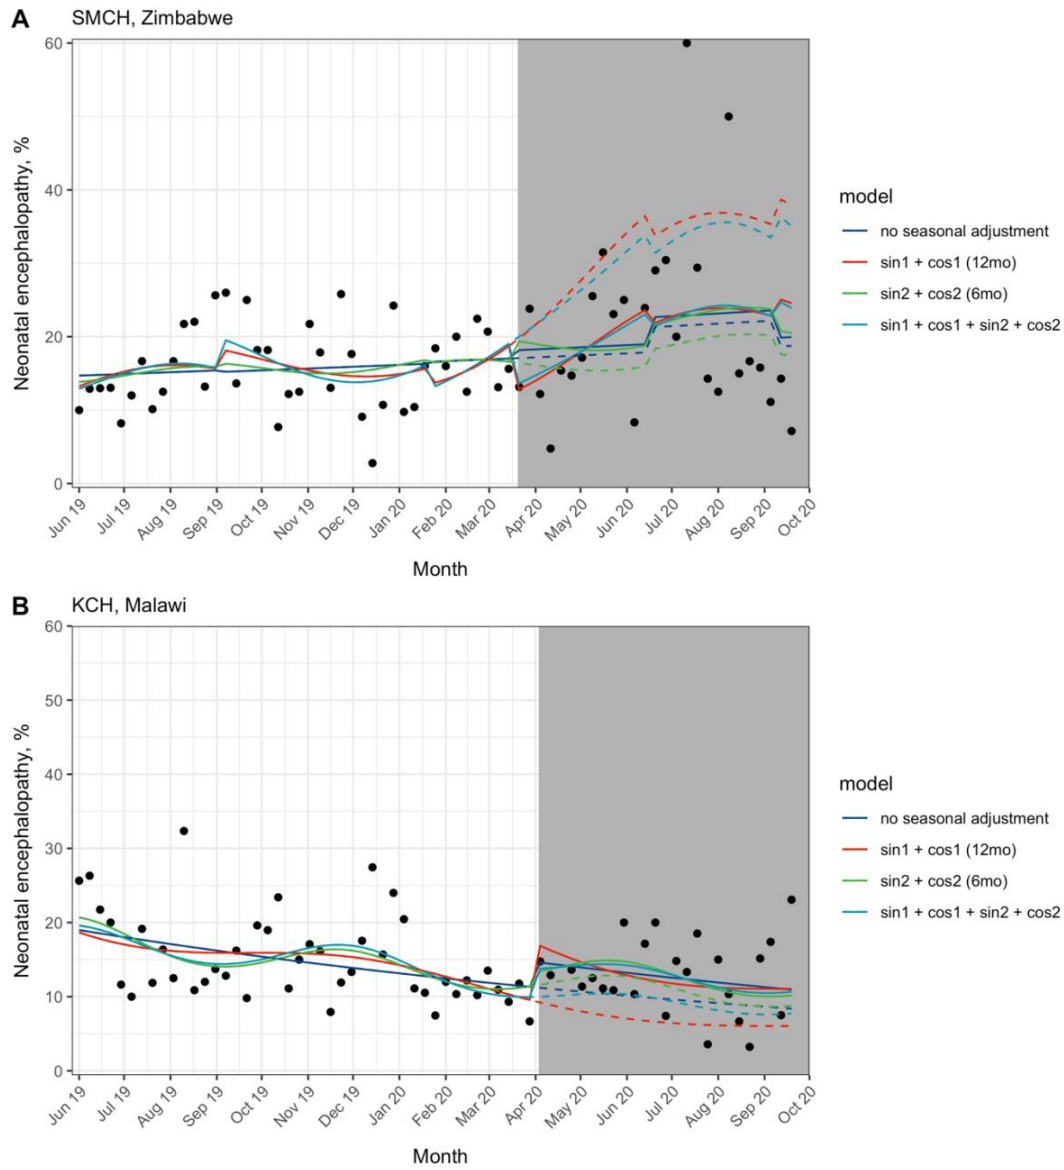

**Figure A5.4.1:** Interrupted time series for prevalence of neonatal encephalopathy, Poisson regression models with and without seasonal adjustment

**Table A5.4.1:** SMCH, Zimbabwe; Results of the models with and without adjustment for seasonality

| Model*                                                                       | BIC   | Deviance† | Df | p-value |
|------------------------------------------------------------------------------|-------|-----------|----|---------|
| 0 Poisson, unadjusted for seasonality                                        | 333.5 | ref       |    |         |
| 1 Poisson, cosine function with 6-month period                               | 336.9 | 5.06      | 2  | 0.08    |
| 2 Poisson, cosine function with 12-month period                              | 341.5 | 0.45      | 2  | 0.80    |
| 3 Poisson, mixture of two cosine functions with 6-month and 12-month periods | 345.0 | 5.39      | 4  | 0.25    |

- \* All models adjusted for the doctors' and nurses' strike periods.
- †  $\chi^2$ -test compared to Model 0.

**Table A5.4.2:** SMCH, Zimbabwe; Poisson model, unadjusted for seasonality (Model 0)

|                             | Coef  | SE   | Exp  | 95% CI      | p-value |
|-----------------------------|-------|------|------|-------------|---------|
| <i>Intercept</i>            | -1.92 | 0.10 |      |             |         |
| Post-COVID-19 period, yes   | 0.06  | 0.18 | 1.06 | 0.74 – 1.52 | 0.74    |
| Study time elapsed, weeks   | 0.00  | 0.00 | 1.00 | 1.00 – 1.01 | 0.39    |
| Doctors' strike period, yes | -0.02 | 0.13 | 0.99 | 0.77 – 1.26 | 0.91    |
| Nurses' strike period, yes  | 0.18  | 0.18 | 1.19 | 0.84 – 1.69 | 0.33    |

**Table A5.4.3:** KCH, Malawi; Results of the models with and without adjustment for seasonality

| Model                                                                        | BIC   | Deviance† | Df | p-value |
|------------------------------------------------------------------------------|-------|-----------|----|---------|
| 0 Poisson, unadjusted for seasonality                                        | 302.3 | ref       |    |         |
| 1 Poisson, cosine function with 6-month period                               | 308.9 | 1.83      | 2  | 0.40    |
| 2 Poisson, cosine function with 12-month period                              | 307.5 | 3.29      | 2  | 0.19    |
| 3 Poisson, mixture of two cosine functions with 6-month and 12-month periods | 315.3 | 3.92      | 4  | 0.42    |

- †  $\chi^2$ -test compared to Model 0.

**Table A5.4.4:** KCH, Malawi; Poisson model, unadjusted for seasonality (Model 0)

|                           | Coef  | SE   | Exp  | 95% CI      | p-value |
|---------------------------|-------|------|------|-------------|---------|
| <i>Intercept</i>          | -1.66 | 0.10 |      |             |         |
| Post-COVID-19 period, yes | 0.27  | 0.19 | 1.31 | 0.91 – 1.88 | 0.15    |
| Study time elapsed, weeks | -0.01 | 0.00 | 0.99 | 0.99 – 1.00 | 0.005   |

**Outcome 5: Overall mortality**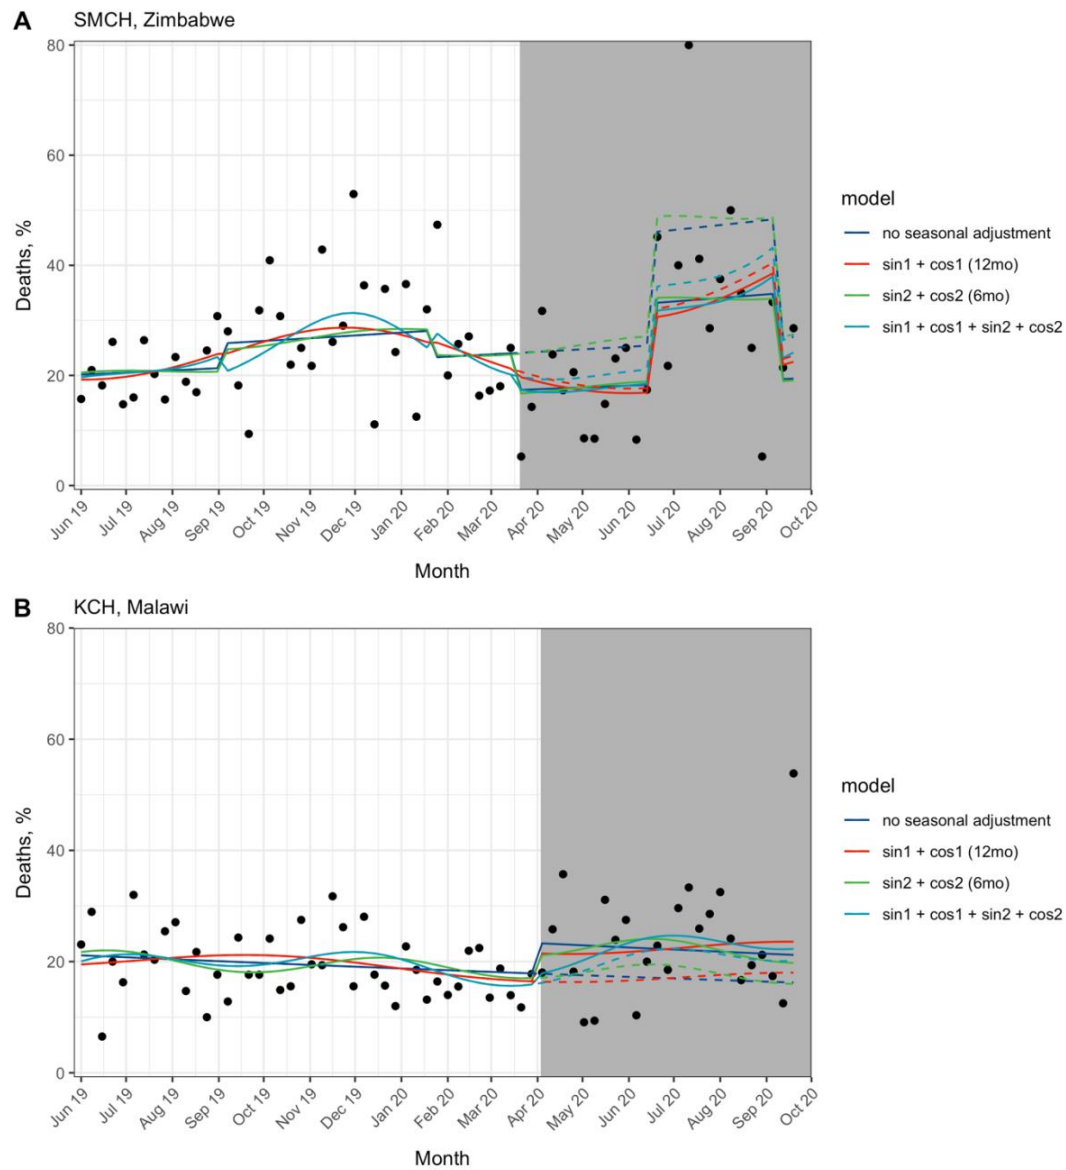

**Figure A5.5.1:** Interrupted time series for overall mortality, negative binomial regression models (SMCH, Zimbabwe) and Poisson regression models (KCH, Malawi) with and without seasonal adjustment

**Table A5.5.1:** SMCH, Zimbabwe; Results of the models with and without adjustment for seasonality

| Model*                                                                                 | BIC   | LR statistic† | Df | p-value |
|----------------------------------------------------------------------------------------|-------|---------------|----|---------|
| 0 Negative binomial, unadjusted for seasonality                                        | 373.0 | ref           |    |         |
| 1 Negative binomial, cosine function with 6-month period                               | 379.2 | 2.32          | 2  | 0.31    |
| 2 Negative binomial, cosine function with 12-month period                              | 381.2 | 0.26          | 2  | 0.88    |
| 3 Negative binomial, mixture of two cosine functions with 6-month and 12-month periods | 385.9 | 4.02          | 4  | 0.40    |

- \* All models adjusted for the doctors' and nurses' strike periods.
- † Likelihood ratio  $\chi^2$ -test compared to Model 0.

**Table A5.5.2:** SMCH, Zimbabwe; Negative binomial model, unadjusted for seasonality (Model 0)

|                             | Coef  | SE   | Exp  | 95% CI      | p-value |
|-----------------------------|-------|------|------|-------------|---------|
| <i>Intercept</i>            | -1.60 | 0.09 |      |             |         |
| Post-COVID-19 period, yes   | -0.33 | 0.17 | 0.72 | 0.52 – 1.00 | 0.05    |
| Study time elapsed, weeks   | 0.00  | 0.00 | 1.00 | 1.00 – 1.01 | 0.24    |
| Doctors' strike period, yes | 0.19  | 0.10 | 1.21 | 0.99 – 1.48 | 0.07    |
| Nurses' strike period, yes  | 0.59  | 0.16 | 1.81 | 1.31 – 2.49 | < 0.001 |

**Table A5.5.3:** KCH, Malawi; Results of the models with and without adjustment for seasonality

| Model                                                                        | BIC   | Deviance† | Df | p-value |
|------------------------------------------------------------------------------|-------|-----------|----|---------|
| 0 Poisson, unadjusted for seasonality                                        | 343.1 | ref       |    |         |
| 1 Poisson, cosine function with 6-month period                               | 349.7 | 1.86      | 2  | 0.39    |
| 2 Poisson, cosine function with 12-month period                              | 349.7 | 1.90      | 2  | 0.39    |
| 3 Poisson, mixture of two cosine functions with 6-month and 12-month periods | 355.4 | 4.69      | 4  | 0.32    |

- †  $\chi^2$ -test compared to Model 0.

**Table A5.5.4:** KCH, Malawi; Poisson model, unadjusted for seasonality (Model 0)

|                           | Coef  | SE   | Exp  | 95% CI      | p-value |
|---------------------------|-------|------|------|-------------|---------|
| <i>Intercept</i>          | -1.56 | 0.09 |      |             |         |
| Post-COVID-19 period, yes | 0.27  | 0.15 | 1.31 | 0.97 – 1.76 | 0.08    |
| Study time elapsed, weeks | -0.00 | 0.00 | 1.00 | 0.99 – 1.00 | 0.29    |

## APPENDIX 6: ADDITIONAL ANALYSES

### Mode of delivery of admitted neonates

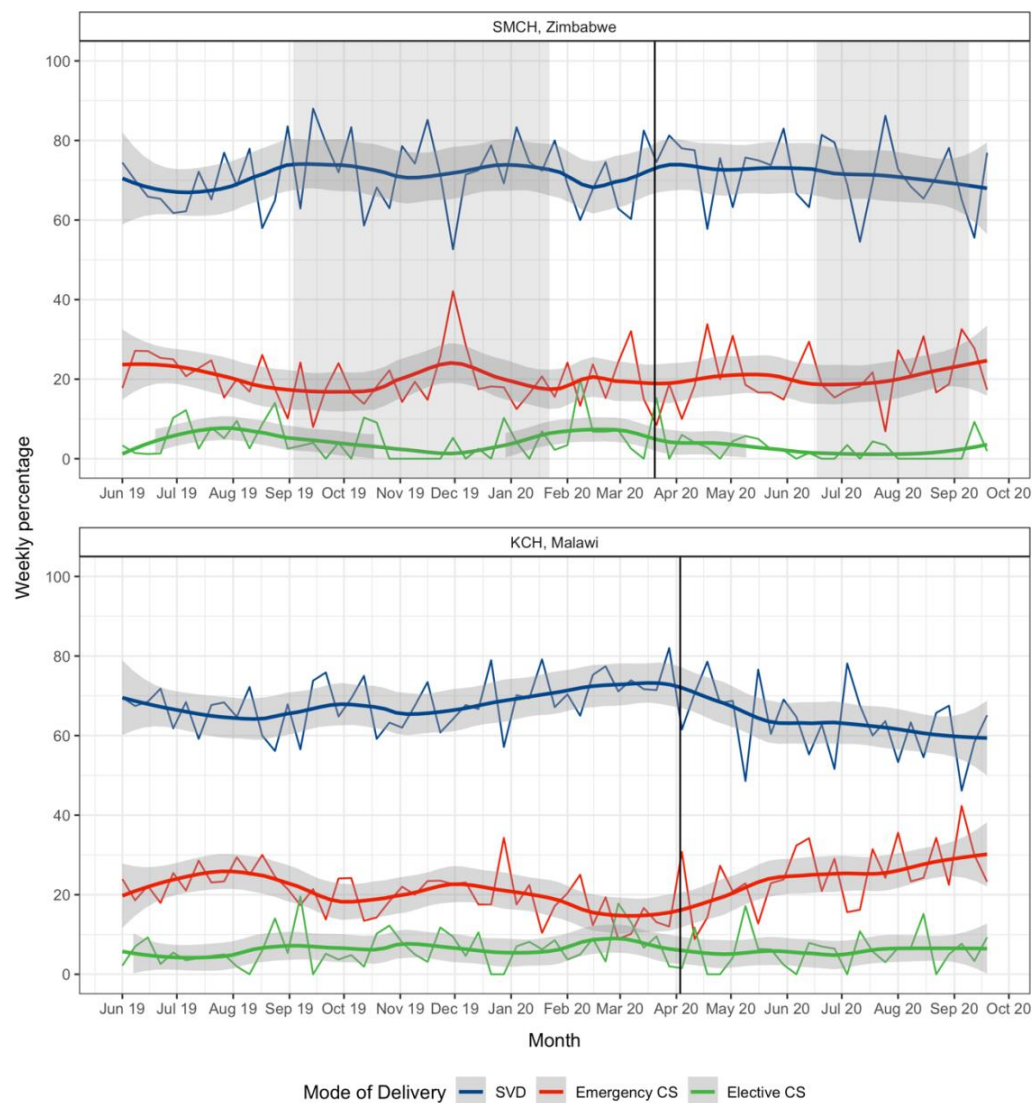

**Figure A6.1.1:** Trend in mode of delivery of admitted neonates per week

- Only SVD, emergency CS and elective CS displayed here to avoid overplotting.
- Smoothed line: local regression (LOESS) model; shaded region: 95% confidence interval.
- Solid vertical line: first confirmed case of COVID-19 in each country.
- Shaded periods on SMCH, Zimbabwe panel: industrial action by doctors (3 September 2019 to 22 January 2020) and nurses (17 July 2020 to 9 September 2020).
- Counts based on all admission forms completed, irrespective of match status.
- *SMCH: Sally Mugabe Central Hospital; KCH: Kamuzu Central Hospital; SVD: spontaneous vaginal delivery; CS: caesarean section*

## Reason for elective caesarean section

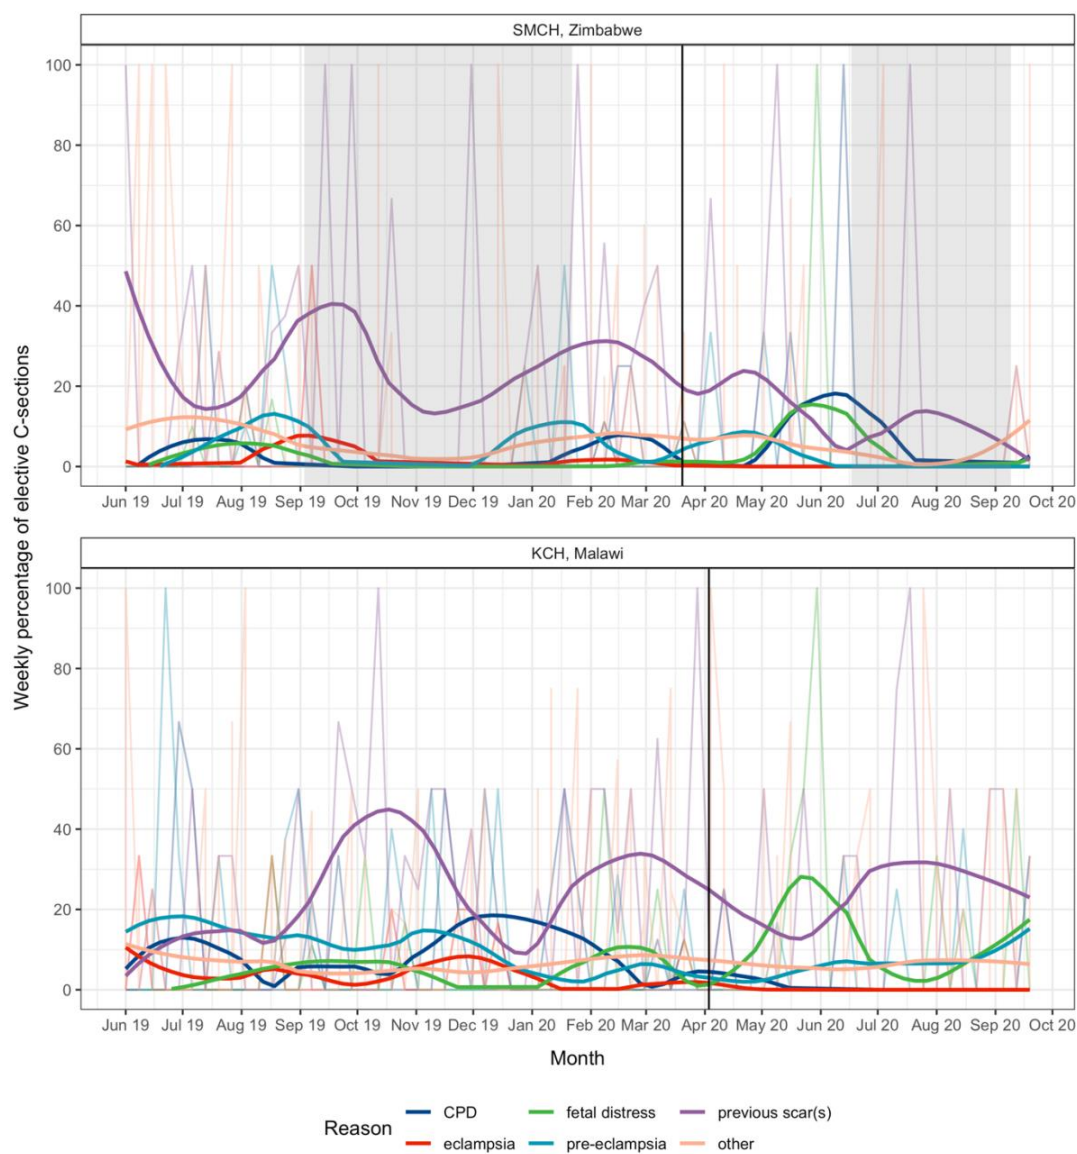

**Figure A6.2.1:** Trend in reason for elective caesarean section per week

- Smoothed line: local regression (LOESS) model; 95% confidence interval not presented to avoid overplotting.
- Solid vertical line: first confirmed case of COVID-19 in each country.
- Shaded periods on SMCH, Zimbabwe panel: industrial action by doctors (3 September 2019 to 22 January 2020) and nurses (17 July 2020 to 9 September 2020).
- Counts based on all admission forms completed, irrespective of match status.
- *SMCH: Sally Mugabe Central Hospital; KCH: Kamuzu Central Hospital; CPD: cephalopelvic disproportion*



### Reason for emergency caesarean section

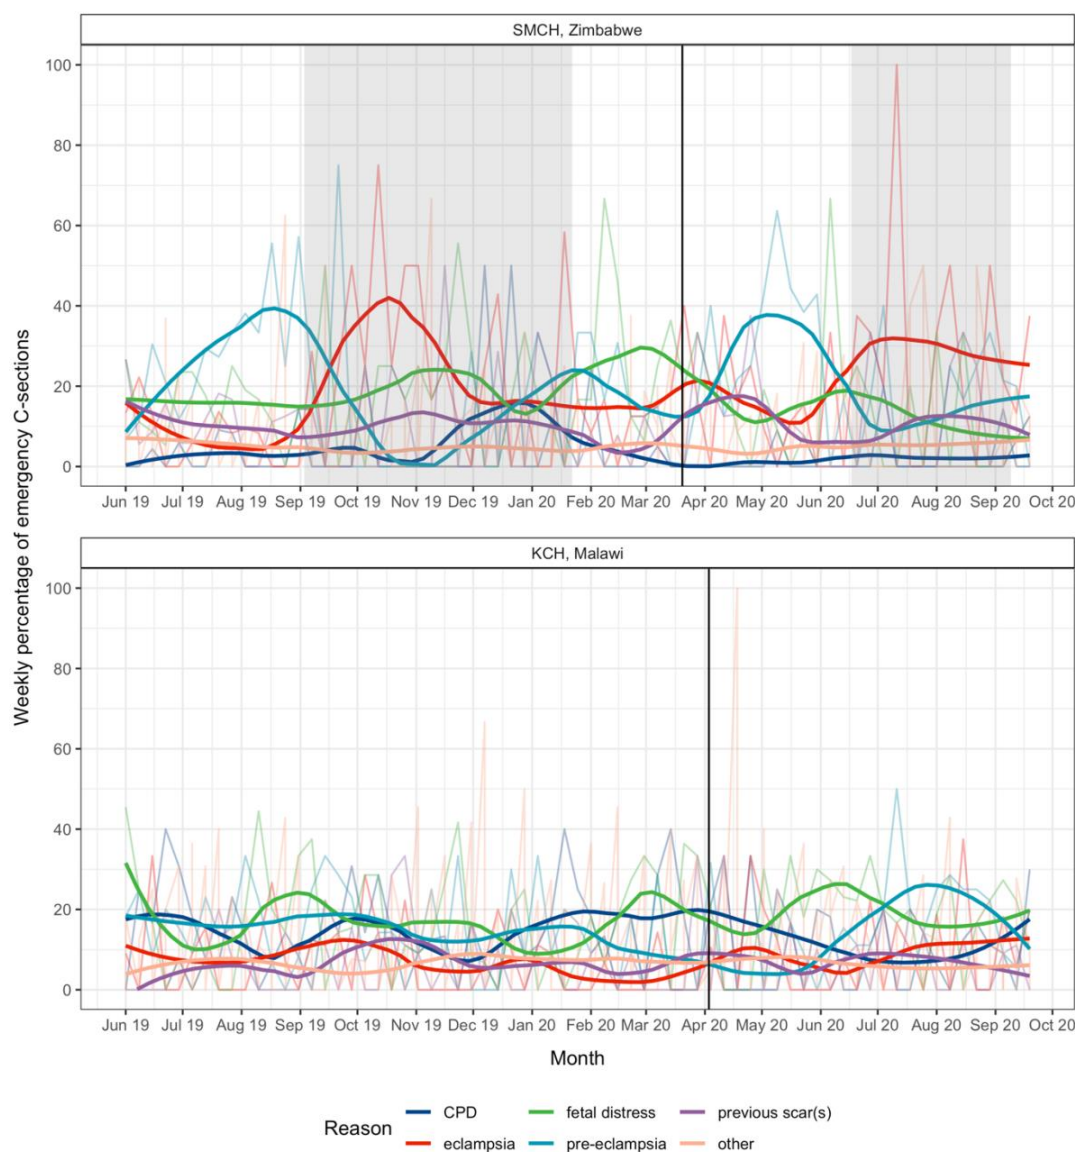

**Figure A6.3.1:** Trend in reason for emergency caesarean section per week

- Smoothed line: local regression (LOESS) model; 95% confidence interval not presented to avoid overplotting.
- Solid vertical line: first confirmed case of COVID-19 in each country.
- Shaded periods on SMCH, Zimbabwe panel: industrial action by doctors (3 September 2019 to 22 January 2020) and nurses (17 July 2020 to 9 September 2020).
- Counts based on all admission forms completed, irrespective of match status.
- *SMCH: Sally Mugabe Central Hospital; KCH: Kamuzu Central Hospital; CPD: cephalopelvic disproportion*
